# Supplementary material for: Pathogenic single nucleotide polymorphisms in RhoA gene: Insights into structural and functional impacts on RhoA-PLD1 interaction through molecular dynamics simulation
Source: PubMed Central journal article supplement — Curr Res Struct Biol. 2024 Nov 28;8:100159. doi: 10.1016/j.crstbi.2024.100159 (PMC11653153; doi:10.1016/j.crstbi.2024.100159), 2024-11-28
Supplement: mmc1.pdf [file mmc1.pdf]

## Supplementary materials

**Figure 1.** Molecular docking analysis of the wild-type RhoA-GDP, mutant G17E-GDP and I86N-GDP complex with PLD1 protein. (A) Wild-type RhoA-GDP-PLD1 docking complex surface area (a) and superimpose structure (b) shows GDP in the pocket and H-bonds of interacting residues, respectively. (B) Mutant G17E-GDP-PLD1 docking complex surface area (a) and superimpose structure (b) shows GDP in the pocket and H-bonds of interacting residues, respectively. (C) Mutant I86N-GDP-PLD1 docking complex surface area (a) and superimpose structure (b) shows GDP in the pocket and H-bonds of interacting residues, respectively.

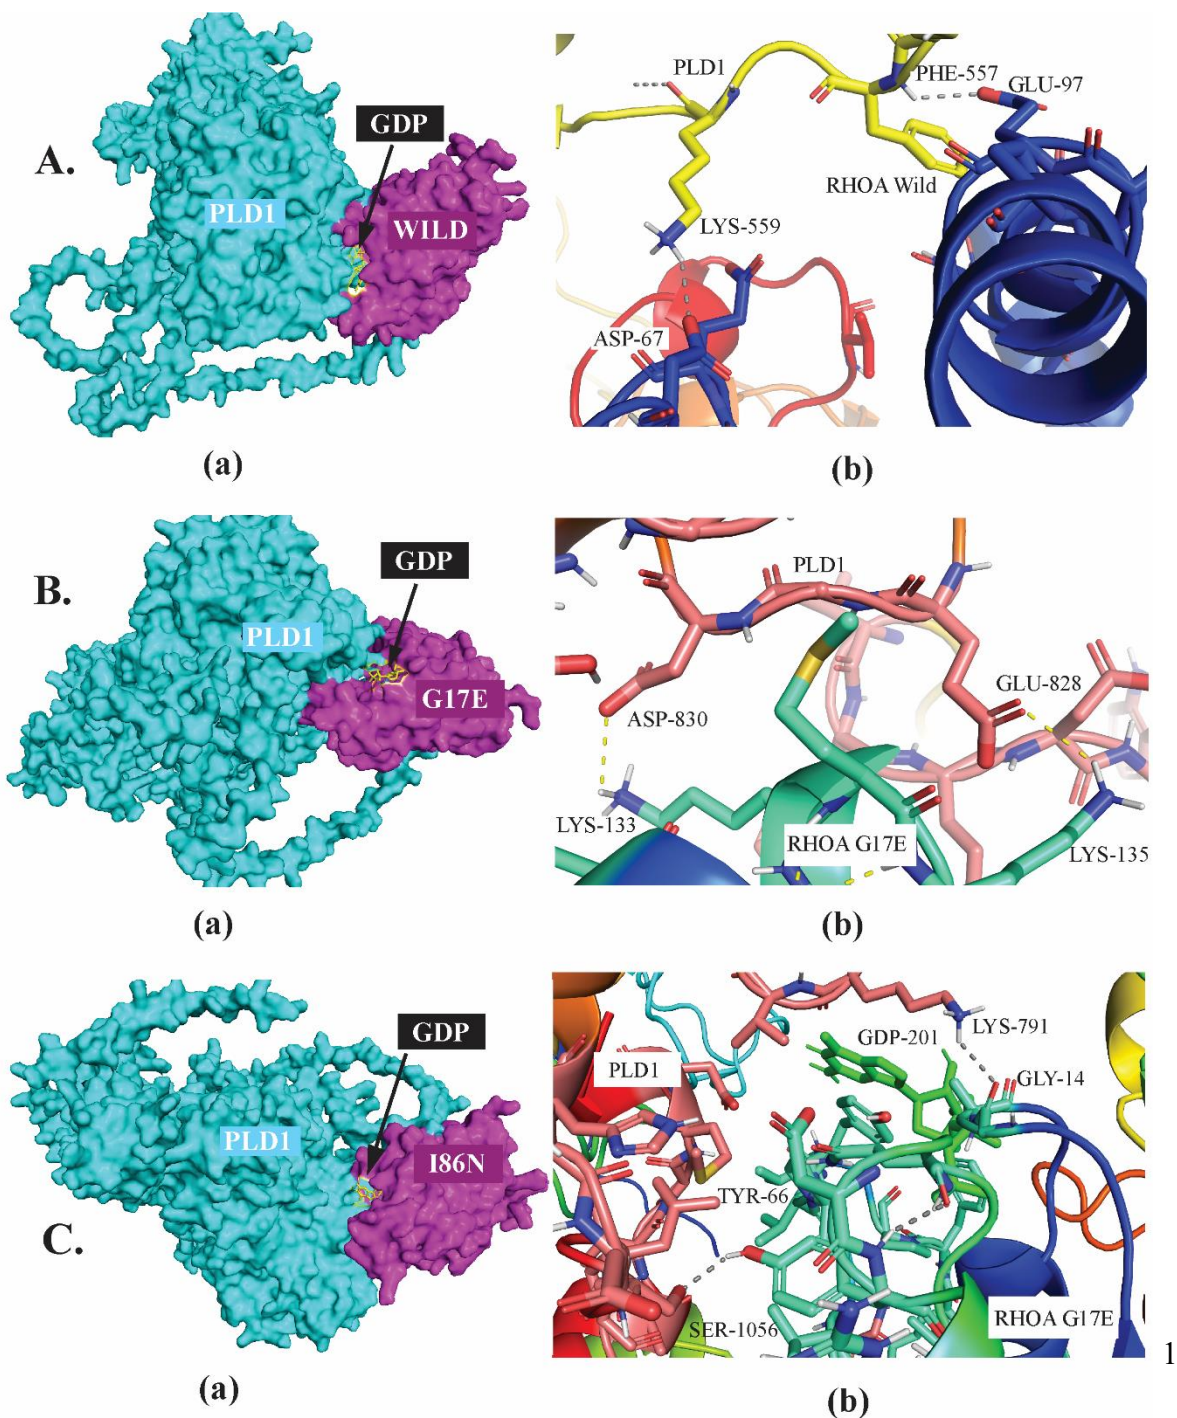

**Table 1.** Effect of nsSNPs on protein stability predicted by I-MUTANT 3.0

| SNP ID       | AA Substitution | I-Mutant | RI (Reliability Index) | DDG-Free energy change value (kcal/mol) |
|--------------|-----------------|----------|------------------------|-----------------------------------------|
| rs1057519951 | E40K            | Decrease | 8                      | -0.81                                   |
| rs1057519954 | Y42S            | Decrease | 6                      | -1.35                                   |
| rs1553631976 | Y66H            | Decrease | 7                      | -1.38                                   |
| rs1575647051 | A61T            | Decrease | 8                      | -0.70                                   |
| rs11552761   | G17E            | Decrease | 1                      | -0.62                                   |
| rs112304179  | F171L           | Decrease | 3                      | -0.94                                   |
| rs1381401434 | I86N            | Decrease | 6                      | -2.19                                   |
| rs1465894043 | I151T           | Decrease | 9                      | -2.05                                   |
| rs1575653732 | V9G             | Decrease | 10                     | -2.06                                   |
